# Supplementary material
Source: PubMed Central journal article supplement (PMC5654859)
Supplement: PRO-26-2195-s001.pdf [file PRO-26-2195-s001.pdf]

# Homology modeling in a dynamical world

Alexander Miguel Monzon<sup>1</sup>, Diego Javier Zea<sup>2</sup>, Cristina Marino-Buslje<sup>2, †, \*</sup>, Gustavo Parisi<sup>1, †, \*</sup>

<sup>1</sup> Departamento de Ciencia y Tecnología, Universidad Nacional de Quilmes, CONICET, Bernal, Argentina

<sup>2</sup> Structural Bioinformatics Unit, Fundación Instituto Leloir, CONICET, C1405BWE, Ciudad Autónoma de Buenos Aires, Buenos Aires, Argentina

†these authors contributed equally to this work

\*Correspondence to: gusparisi@gmail.com, Roque Sáez Peña 182, Bernal (B1876BXD) Argentina; cmb@leloir.org.ar, Av. Patricias Argentinas 435, Ciudad Autónoma de Buenos Aires (C1405BWE), Argentina.

## Supporting information

| Structural measures                | Average CD [Å] |         |         |         |
|------------------------------------|----------------|---------|---------|---------|
|                                    | (0,0.5]        | (0.5,1] | (1,1.5] | (1.5,4] |
| <i>RMSD</i>                        | -0.83          | -0.78   | -0.55   | -0.32   |
| <i>Fraction of unconserved SS</i>  | -0.75          | -0.76   | -0.74   | -0.71   |
| <i>Fraction of unconserved RSA</i> | -0.86          | -0.87   | -0.81   | -0.80   |

**S1 Table. Spearman's rho coefficients** calculated in bins of average CD between structural measures and percent of sequence identity.

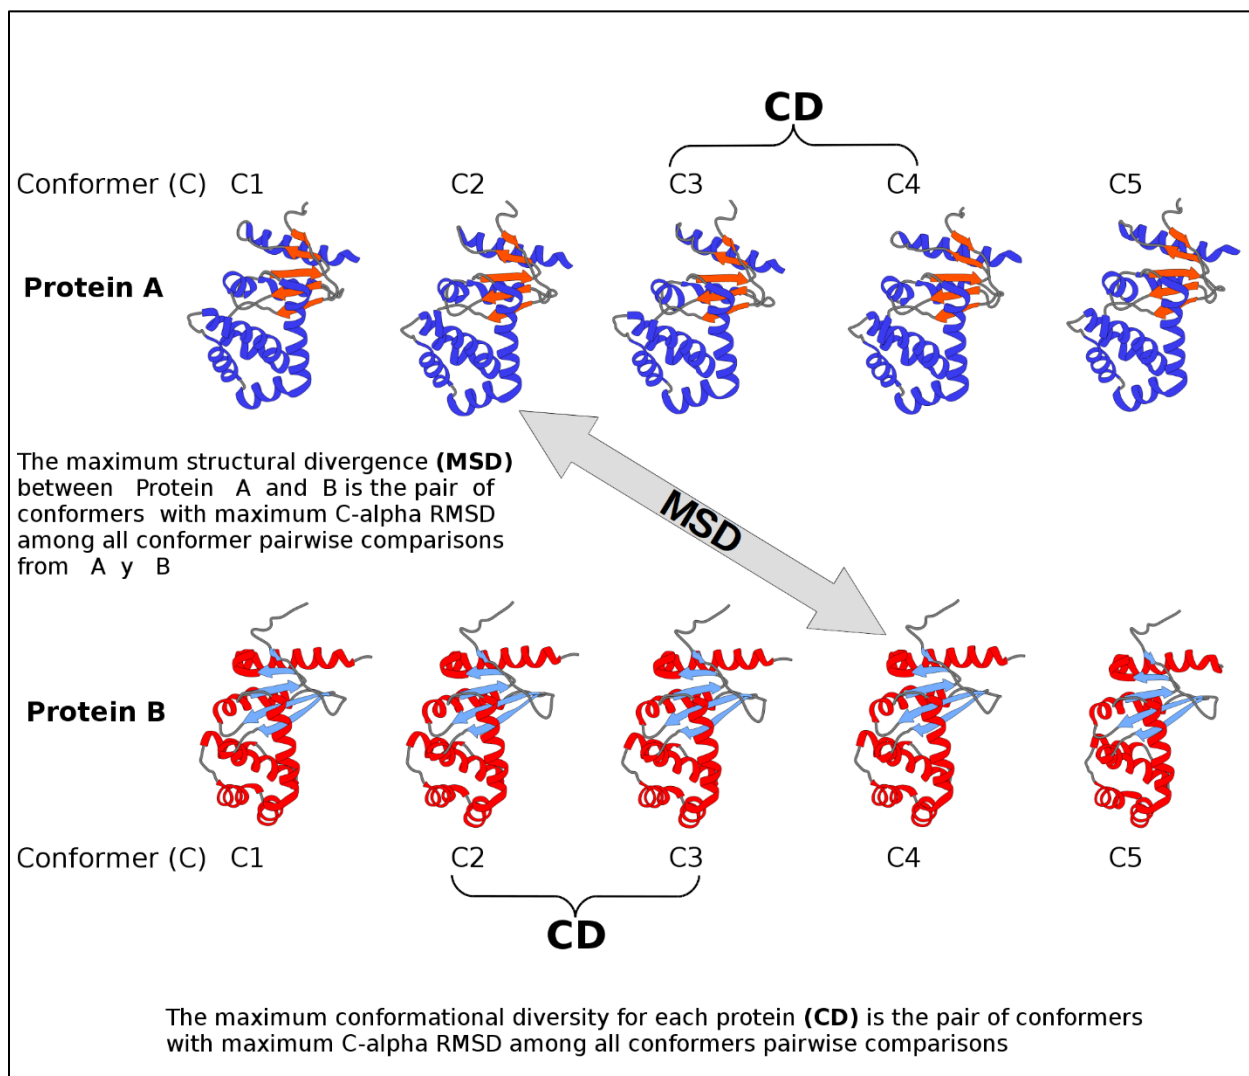

**S1 Fig. Schematic representation of the derivation of MSD (Maximum Structural Divergence) and CD (conformational diversity)**

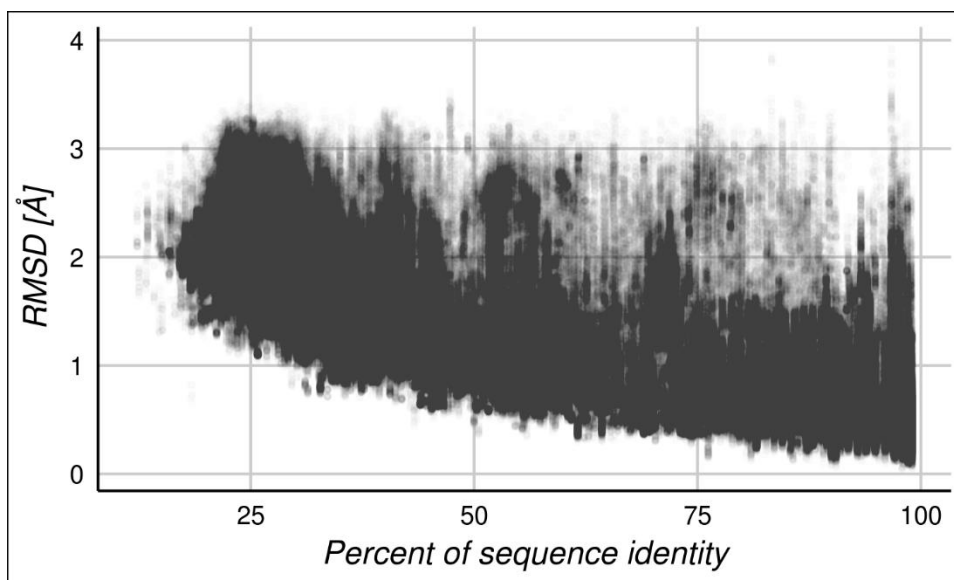

**S2 Fig. RMSD vs percent of sequence identity.** RMSD obtained from an all vs all comparison between two homologous proteins considering all their conformers. The figure contains about 3.5 million comparisons.

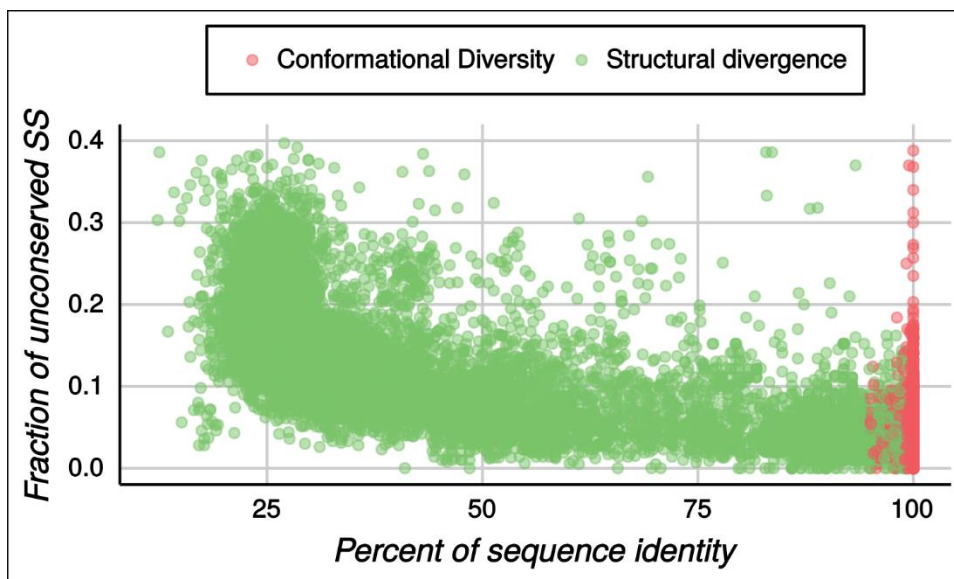

**S3 Fig. Fraction of unconserved secondary structure (SS) (in pairs MSD and CD) versus sequence percent identity.** Axis Y refer to the fraction of residues which change their secondary structure between structures from two homologous proteins (MSD), or from the same protein (CD). (A) Green dots: comparisons between homologous protein pairs. Red dots: comparison between conformers of the same protein.

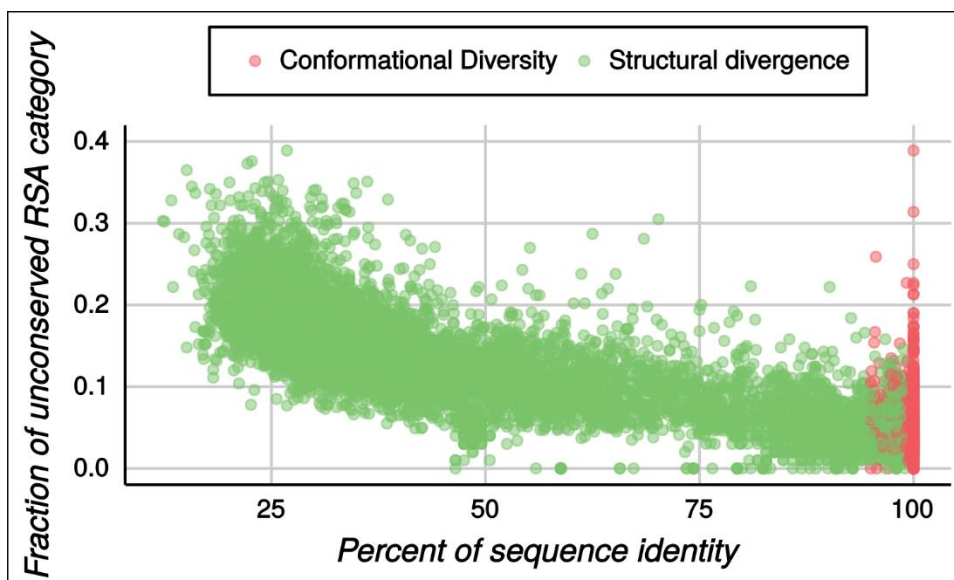

**S4 Fig. Fraction of unconserved relative solvent accessibility category (RSA) (in pairs MSD and CD) versus sequence percent identity.** Axis Y refer to the fraction of residues which change to buried/exposed between structures from two homologous proteins (MSD), or from the same protein (CD). Green dots: comparisons between homologous protein pairs. Red dots: comparison between conformers of the same protein.

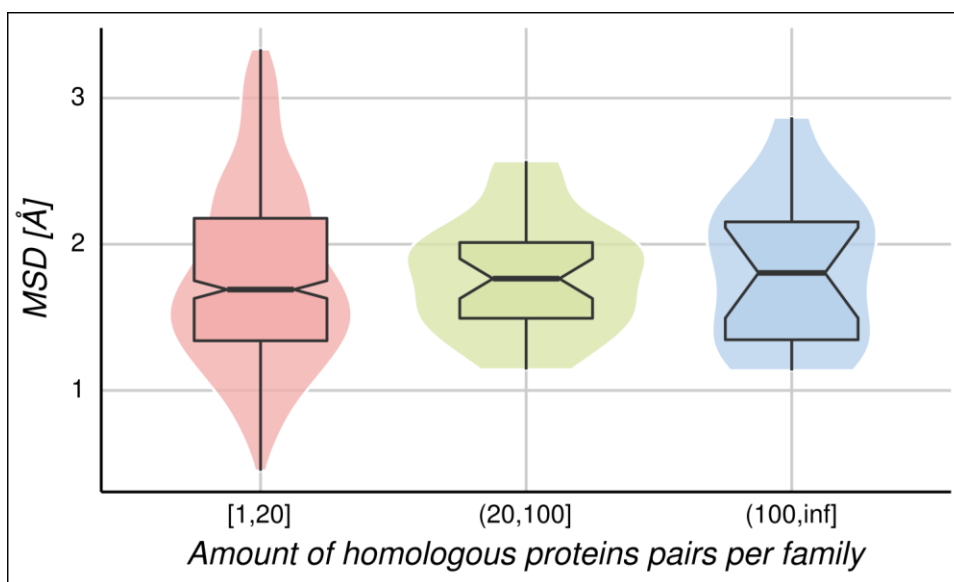

**S5 Fig. Distributions of MSD in bins of homologous protein pairs number contained in each family.** It is possible to see that the distribution of MSD is not influenced by how populated the family is.

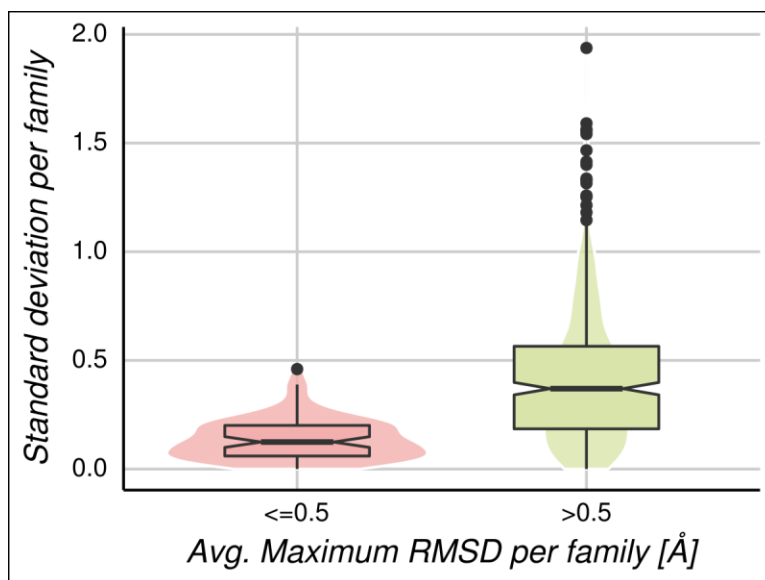

**S6 Fig. Distribution of the standard deviation of RMSD due to CD per family estimated over the CD for each protein by family.** Standard deviations have been accumulated in two extreme cases, families with low (less than 0.5 Å of RMSD) and high CD (more than 0.5 Å of RMSD).

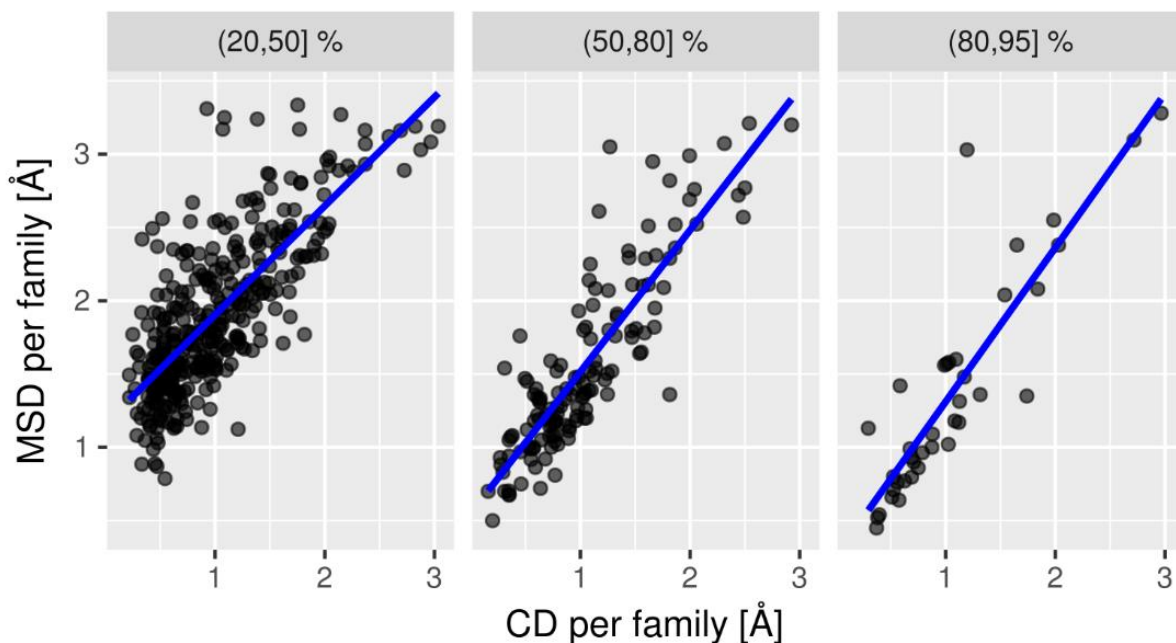

**S7 Fig. Relationship between MSD and CD in bins of sequence identity percent.** Each dot represents the average RMSD values for the MSD and the CD in a specific family. The number of families in each bin are 348, 138 and 38 with Pearson's correlation coefficients of 0.77, 0.87 and 0.88 respectively.

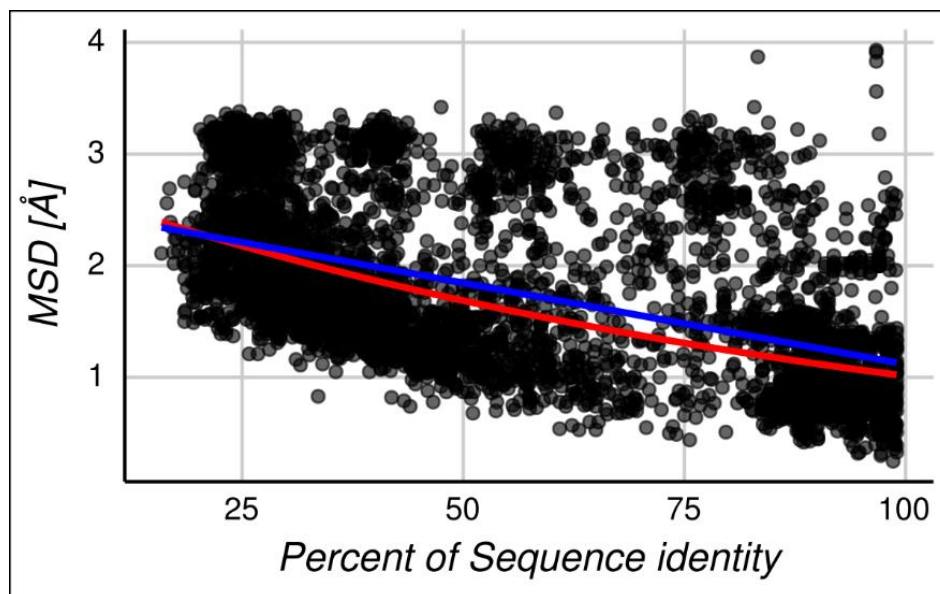

**S8 Fig. Maximum structural divergence (MSD) versus percent of sequence identity for each homologous protein pair.** The lineal (blue line) and exponential (red line) regressions are shown. All homologous protein pairs containing just ordered conformers. The linear and exponential fitted expressions are  $RMSD = 2.57 - 0.015 SEQID$  and  $RMSD = e^{1.03} e^{-0.010 SEQID}$ , respectively.
